# Supplementary material for: Purification and Biochemical Characterization of TsMS 3 and TsMS 4: Neuropeptide-Degrading Metallopeptidases in the Tityus serrulatus Venom
Source: MDPI journal article supplement (doi:10.3390/toxins11040194), 2019-03-31
Supplement: s1 [file s1]

# Supplementary Materials: Purification and Biochemical Characterization of TsMS 3 and TsMS 4: Neuropeptide-Degrading Metallopeptidases in The *Tityus serrulatus* Venom

Daniela Cajado-Carvalho, Cristiane Castilho Fernandes da Silva, Roberto Tadashi Kodama, Douglas Oscar Ceolin Mariano, Daniel Carvalho Pimenta, Bruno Duzzi, Alexandre Kazuo Kuniyoshi and Fernanda Vieira Portaro

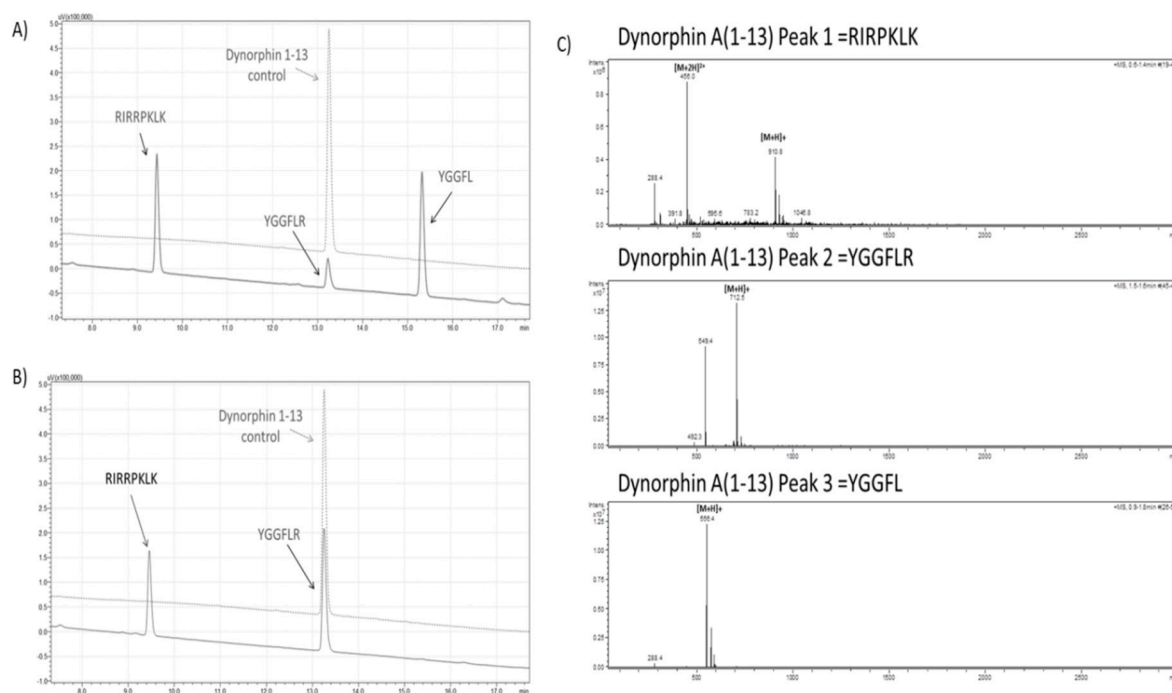

**Figure S1.** Profile of Dynorphin A (1-13), 30  $\mu$ M, cleaved by (A) Fraction F3 and (B) Fraction F5. Each fraction was incubated with this peptide in a water bath at 37  $^{\circ}$ C for 90 minutes. Hydrolyses were visualized using a C-18 RP-HPLC system (Shimadzu) with UV detection at 214 nm. (C) Each individual peak corresponded to hydrolysis products were collected and analyzed by LC-MS to determine the monoisotopic mass and, therefore, its sequence.

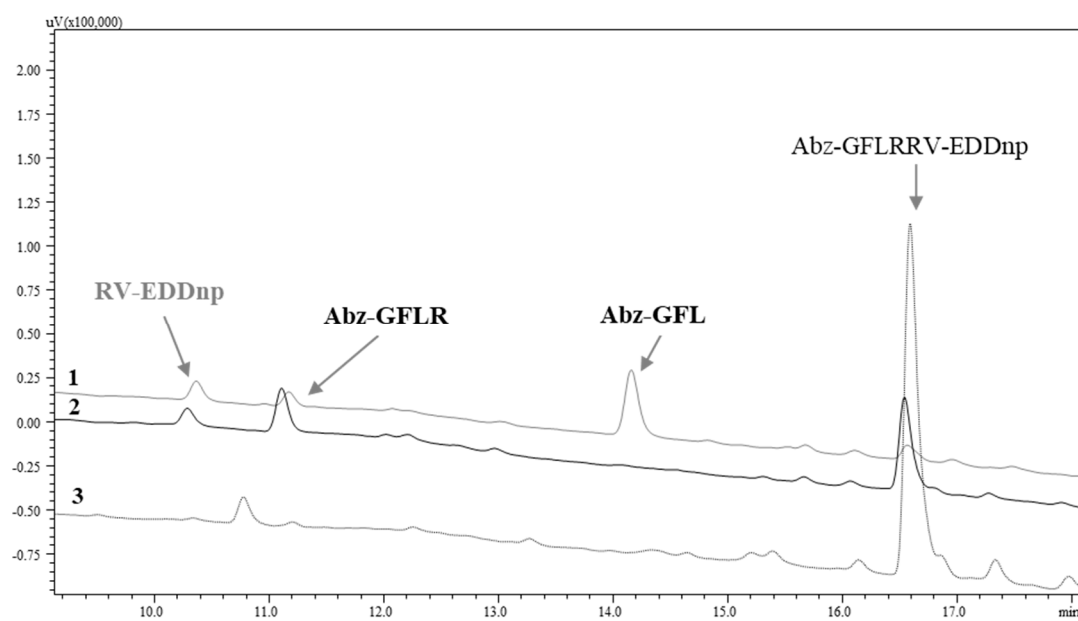

**Figure S2.** Chromatographic profiles of the fluorescent substrate Abz-GFLRRV-EDDnp hydrolysis by metalloprotease 3 (line 1, grey) and metalloprotease 4 (line 2, black) in comparison to the integral peptide (line 3, dotted). The confirmation of each peak content was performed by mass spectrometry analysis.
